# Supplementary material
Source: ML conference proceedings conference paper supplement (https://openreview.net/forum?id=0tnhFpyWjb)
Supplement: supplementary_material [file attachment]

Due to the OpenReview max file size limitation, we upload a representative subset of the dataset. All the dataset will be provided if the paper is accepted.

To run the three benchmarks: the alloy production problem, the 0-1 knapsack problem, and the nurse scheduling problem:

1. Enter the corresponding folder
2. Move the dataset into the “data” folder and unzip all the data files
3. Run “python3 train.py”

For example, to run the brass experiment in the alloy production problem:

1. Enter “./code/Alloy production” folder
2. Move all the files in the“./data/Alloy production/brass” folder into the “./code/Alloy production/data” folder and unzip all the data files
3. Run “python3 train.py”
